# Supplementary material for: Impacts of highway traffic exhaust in alpine valleys on the respiratory health in adults: a cross-sectional study
Source: Springer Nature journal article supplement (doi:10.1186/1476-069x-10-13), 2011-03-04
Supplement: Additional file 3 [file 1476-069x-10-13-s3.doc]

**Additional File 3 – Sensitivity and supplementary analyses**

**Additional File 3, Table S1.** Characteristics of the study population and a sub-group with allergy by residential distance to highway. The number of actual persons are displayed in brackets.

|  | **All participants**  **(total group)** | | **Low exposure** | | **High exposure** | | **Low exposure** | | **High exposure** | |
| --- | --- | --- | --- | --- | --- | --- | --- | --- | --- | --- |
| **(>200 m of a highway)** | | **(≤200 m of a highway)** | | **Participants with allergic  rhinitis or hay fever** | | | |
| n | 1581 | | 1384 | | 197 | | 288 | | 42 | |
| Men (%) | 46.5 | *(735)* | 45.6 | *(631)* | 52.8 | *(104)* | 46.9 | *(135)* | 57.1 | *(24)* |
| Age, mean | 41.7 |  | 41.9 |  | 40.2 |  | 37.7 |  | 36.5 |  |
| Primary school education only (%) | 5.7 | *(90)* | 5.7 | *(79)* | 5.6 | *(11)* | 3.8 | *(11)* | 2.4 | *(1)* |
| Swiss nationality (%) | 88.2 | *(1394)* | 87.6 | *(1212)* | 92.4 | *(182)* | 88.2 | *(254)* | 90.5 | *(38)* |
| Body Mass Index, mean | 24.4 |  | 24.4 |  | 24.5 |  | 23.7 |  | 24.2 |  |
| Maternal atopy (%) | 12.4 | *(196)* | 12.9 | *(179)* | 8.6 | *(17)* | 25.7 | *(74)* | 9.5 | *(4)* |
| Early childhood respiratory infection (%) | 7.7 | *(121)* | 7.4 | *(102)* | 9.6 | *(19)* | 11.5 | *(33)* | 11.9 | *(5)* |
| ETS exposure (%) | 27.3 | *(431)* | 27.0 | *(374)* | 28.9 | *(57)* | 30. | *(87)* | 31.0 | *(11)* |
| ETS exposure at workplace (%) | 12.5 | *(197)* | 12.6 | *(174)* | 11.7 | *(23)* | 13.5 | *(39)* | 11.9 | *(5)* |
| Occupational exposure, current (%) | 12.7 | *(200)* | 12.5 | *(173)* | 13.7 | *(27)* | 11.1 | *(32)* | 16.7 | *(7)* |
| Never smoker (%) | 57.2 | *(905)* | 57.6 | *(797)* | 54.8 | *(108)* | 63.9 | *(184)* | 71.4 | *(30)* |
| Current smoker (%) | 22.6 | *(357)* | 22.3 | *(308)* | 24.9 | *(49)* | 17.7 | *(51)* | 11.9 | *(5)* |
| Former smoker (%) | 20.2 | *(319)* | 20.2 | *(279)* | 20.3 | *(40)* | 18.4 | *(53)* | 16.7 | *(7)* |
| Smoked cigarettes (packyears), mean | 6.6 |  | 6.6 |  | 6.7 |  | 4.3 |  | 6.0 |  |
| Wheezing with breathing problems (%) | 4.7 | *(74)* | 4.5 | *(62)* | 6.1 | *(12)* | 9.7 | *(28)* | 11.9 | *(5)* |
| Wheezing without colds (%) | 4.9 | *(77)* | 4.6 | *(63)* | 7.1 | *(14)* | 7.3 | *(21)* | 11.9 | *(5)* |
| Regular phlegm (%) | 10.5 | *(166)* | 10.3 | *(143)* | 11.7 | *(23)* | 13.2 | *(38)* | 16.7 | *(7)* |
| Regular cough (%) | 15.0 | *(236)* | 14.9 | *(206)* | 15.2 | *(30)* | 18.9 | *(54)* | 21.4 | *(9)* |
| Chronic cough (%) | 5.8 | *(91)* | 5.4 | *(75)* | 8.1 | (16) | 6.6 | *(19)* | 16.7 | *(7)* |
| Chronic cough or chronic phlegm (%) | 6.7 | *(106)* | 6.5 | *(90)* | 8.1 | (16) | 9.4 | *(27)* | 16.7 | *(7)* |
| Doctor diagnosed asthma (%) | 8.9 | *(140)* | 9.1 | *(126)* | 7.1 | (14) | 20.8 | *(60)* | 14.3 | *(6)* |
| Allergic rhinitis or hay fever (%) | 20.9 | *(330)* | 20.8 | *(288)* | 21.3 | (42) |  |  |  |  |

**Additional File 3, Table S2. Adjusted odds ratios and 95% confidence intervals for reported respiratory symptoms associated with "living within 200 m of a highway" as traffic exposure proxy. Participants with and without doctor diagnosed asthma.**

| **Symptoms** | **Participants with or without doctor diagnosed asthma**  **n = 1566-1568** | | |
| --- | --- | --- | --- |
| with doctor diagnosed asthma | without doctor diagnosed asthma | p-value for interaction |
| Wheezing with breathing problems | 5.50 (0.95-31.7) | 2.24 (0.85-5.95) | 0.34 |
| Wheezing without colds | 4.80 (0.92-25.2) | 2.84 (1.11-7.27) | 0.54 |
| Regular cough | 2.96 (0.78-11.2) | 1.25 (0.65-2.40) | 0.20 |
| Regular phlegm | 1.25 (0.27-5.80) | 1.19 (0.59-2.40) | 0.94 |
| Chronic cough | 7.79 (1.03-22.2) | 2.62 (1.03 -6.67) | 0.43 |
| Chronic cough or phlegm | 3.37 (0.75-15.3) | 2.26 (0.92 -5.54) | 0.59 |

**Additional File 3, Table S3. Adjusted odds ratios and 95% confidence intervals for reported respiratory symptoms associated with "living within 200 m of a highway" as traffic exposure proxy, from a model including only community but no individual factors.**

| **Symptoms** | **Adjusted only for community**  n = 1566-1568 | **Adjusted for individual factors and community**  n = 1566-1568 |
| --- | --- | --- |
| Wheezing with breathing problems | 1.54 (0.69-3.43) | 2.64 (1.07-6.48)* |
| Wheezing without cold | 2.07 (0.93-4.61) | 3.10 (1.27-7.55)* |
| Regular cough | 1.30 (0.72-2.35) | 1.36 (0.72-2.56) |
| Regular phlegm | 1.14 (0.60-2.19) | 1.19 (0.60-2.38) |
| Chronic cough | 2.29 (1.00-5.23)* | 2.88 (1.17-7.05)* |
| Chronic cough or phlegm | 1.85 (0.84-4.07) | 2.40 (1.01-5.70)* |

*p-value <0.05

**Additional File 3, Table S4. Adjusted odds ratios and 95% confidence intervals for reported respiratory symptoms associated with "living within 200 m of a highway" as traffic exposure proxy. Adjusted for all covariates other than doctor’s diagnosed asthma.**

| **Symptoms** | **Total group**  n = 1566-1568 | **Participants with or without hay fever or allergic rhinitis**  n = 1561-1563 | |
| --- | --- | --- | --- |
| **with hay fever or allergic rhinitis** | **without hay fever or allergic rhinitis** |
| Wheezing with breathing problems | 1.82 (0.78-4.21) | 1.76 (0.50-6.14) | 1.75 (0.65-4.72) |
| Wheezing without colds | 2.13 (0.92-4.92) | 2.74 (0.79-9.51) | 1.88 (0.73-4.83) |
| Regular cough | 1.24 (0.67-2.32) | 1.65 (0.63-4.30) | 1.18 (0.60-2.33) |
| Regular phlegm | 1.11 (0.56-2.20) | 1.26 (0.44-3.60) | 1.03 (0.49-2.18) |
| Chronic cough | 2.34 (0.98-5.59) | 5.18 (1.57-17.10) | 1.64 (0.61-4.39) |
| Chronic cough or phlegm | 1.90 (0.82-4.37) | 3.32 (1.06-10.40) | 1.45 (0.56-3.74) |

*p-value <0.05

**Additional File 3, Table S5. Adjusted odds ratios and 95% confidence intervals for reported respiratory symptoms associated with "living within 200 m of a highway" as traffic exposure proxy, among Swiss citizens only**.

| **Symptoms** | **Subsample of Swiss citizens** | **n** |
| --- | --- | --- |
| Wheezing with breathing problems | 2.44 (0.94-6.34) | 1381 |
| Wheezing without colds | 2.61 (1.01-6.72)* | 1381 |
| Regular cough | 1.60 (0.83-3.07) | 1379 |
| Regular phlegm | 1.36 (0.66-2.77) | 1381 |
| Chronic cough | 3.34 (1.31-8.51)* | 1380 |
| Chronic cough or phlegm | 2.73 (1.12-6.66)* | 1380 |

*p-value <0.05

**Additional File 3, Table S6. Adjusted odds ratios and 95% confidence intervals for reported respiratory symptoms associated with "living within 200 m of a highway" as traffic exposure proxy, after exclusion of persons living within 50m of a major road**.

| **Symptoms** | **Participants living more than 50m of a main road** | **n** |
| --- | --- | --- |
| Wheezing with breathing problems | 1.88 (0.73-4.89) | 1127 |
| Wheezing without colds | 2.39 (0.92-6.24) | 1127 |
| Regular cough | 1.58 (0.80-3.12) | 1125 |
| Regular phlegm | 1.41 (0.67-2.98) | 1127 |
| Chronic cough | 2.99 (1.14-7.88)* | 1126 |
| Chronic cough or phlegm | 2.41 (0.95-6.11) | 1126 |

*p-value <0.05

**Additional File 3, Table S7. Adjusted odds ratios and 95% confidence intervals for reported respiratory symptoms associated with "living within 200 m of a highway" as traffic exposure proxy, from a model taking into account satisfaction with air quality**.

| **Symptoms** | **Core model  +  satisfaction with air quality 1**  n=7972 | **Core model**  n = 7972 |
| --- | --- | --- |
| Wheezing with breathing problems | 2.28 (0.54-9.66) | 2.11 (0.51-8.73) |
| Wheezing without cold | 2.32 (0.51-10.5) | 2.51 (0.61-10.4) |
| Regular cough | 0.99 (0.41-2.41) | 1.07 (0.45-2.53) |
| Regular phlegm | 1.05 (0.37-2.95) | 1.17 (0.43-3.22) |
| Chronic cough | 2.22 (0.56-8.78) | 2.43 (0.66-8.98) |
| Chronic cough or phlegm | 2.16 (0.58-7.98) | 2.34 (0.66-8.28) |

1Satisfaction with air quality was assessed on an integer scale from -5 to 5. To account for non-linearities in the relationship, a third order polynomial of this variable was used in the model.
2Satisfaction with air quality was provided by about 50% of our study participants in a previous survey.
